# Supplementary material
Source: publisher figshare collection journal article supplement (https://gsajournals.figshare.com/ndownloader/files/24620861)
Supplement: Supplementary file 1 [file 24620861]

## Sheet: Foreign DNA fragments
Table S2: List of HGT fragments and mutations identified in each of the three other-Bacillus populations.
lineage	start	stop	length	num variants	donor	freq gen 42	freq gen 84	freq gen 126	freq gen 168	freq gen 210	freq gen 252	freq gen 294	freq gen 336	freq gen378	freq gen 420	freq gen 462	freq gen 504
other-Bacillus 1	1749189	1767774	18586	249	RS-D-2	0	0	0	0	0.0281	0.1362	0.2868	0.8238	0.9007	0.8331	0.8699	0.7412
other-Bacillus 1	1139995	1145535	5540	100	RS-D-2	0	0	0	0	0.0667	0.1752	0.471	0.049	0	0.0645	0.0337	0.0771
other-Bacillus 1	3257317	3266918	9601	206	RO-E-2	0	0	0	0	0.0547	0.1554	0.4703	0.046	0	0.0539	0.0343	0.0533
other-Bacillus 1	3799559	3813876	14318	558	RO-E-2	0	0	0	0	0.07155	0.1578	0.45685	0.05215	0	0.06885	0.03605	0.0786
other-Bacillus 2	3812641	3816944	4304	102	RS-D-2	0	0	0	0	0	0	0.12635	0.14745	0.199	0.0539	0.6078	0.7589
other-Bacillus 3	3187379	3187781	403	29	RO-E-2	0	0	0	0.0228	0.2256	0.5298	0.3191	0.0963	0.0939	0.6419	0.534	0.1811
other-Bacillus 3	248684	251111	2428	59	RO-FF-1	0	0	0	0	0.2547	0.5264	0.3574	0.1006	0.1055	0.6834	0.5574	0.1842
other-Bacillus 3	507400	510491	3092	41	RO-FF-1	0	0	0	0	0.2516	0.5222	0.3633	0.1002	0.1078	0.675	0.5567	0.1963
other-Bacillus 3	840398	842545	2148	139	RO-E-2	0	0	0	0	0.2516	0.5011	0.3288	0.0923	0.0941	0.6577	0.5303	0.1825
other-Bacillus 3	894848	898769	3922	271	RO-E-2	0	0	0	0	0.2306	0.5024	0.3388	0.0988	0.0993	0.6549	0.5365	0.1865
other-Bacillus 3	1033701	1033851	151	6	RO-E-2	0	0	0	0	0.2398	0.5005	0.3624	0.0981	0.11625	0.69315	0.5621	0.18785
other-Bacillus 3	3091816	3111293	19477	363	RS-D-2	0	0	0	0	0.25105	0.52205	0.35645	0.0975	0.1025	0.66855	0.5553	0.1942
other-Bacillus 3	3229881	3230526	646	39	RO-E-2	0	0	0	0	0.2306	0.4812	0.3322	0.0871	0.0939	0.6708	0.5227	0.1867
other-Bacillus 3	3234892	3239242	4351	232	RO-E-2	0	0	0	0	0.2565	0.51025	0.35005	0.0965	0.0988	0.67565	0.54705	0.1926
other-Bacillus 3	3304264	3314986	10723	133	RS-D-2	0	0	0	0	0.262	0.5163	0.3629	0.1034	0.1009	0.681	0.5615	0.2059
other-Bacillus 3	3759232	3763668	4436	34	RO-FF-1	0	0	0	0	0.2529	0.5162	0.3695	0.0998	0.1041	0.6873	0.5602	0.2012
other-Bacillus 3	3799801	3807151	7351	339	RO-E-2	0	0	0	0	0.2597	0.5195	0.3636	0.1017	0.1002	0.6743	0.544	0.1981
other-Bacillus 3	3810795	3821329	10535	202	RS-D-2	0	0	0	0	0.251	0.51205	0.35615	0.1023	0.1	0.68465	0.5855	0.2098
other-Bacillus 3	1983698	1990002	6305	104	RS-D-2	0	0	0	0	0.2423	0.50435	0.33635	0.0952	0.0886	0.6596	0.5418	0.18515
other-Bacillus 3	1435748	1438316	2569	148	RO-E-2	0	0	0	0	0.24345	0.5192	0.3571	0.09555	0.09625	0.67375	0.54395	0.2
other-Bacillus 3	1438544	1439015	472	29	RO-E-2	0	0	0	0	0.2386	0.494	0.3349	0.0962	0.1002	0.6567	0.5528	0.1926
other-Bacillus 3	2960442	2967458	7017	120	RS-D-2	0	0	0	0	0.2416	0.52515	0.35465	0.0924	0.09945	0.6697	0.5354	0.1959
other-Bacillus 3	1755993	1764229	8237	88	RO-FF-1	0	0	0	0	0.06195	0.28605	0.52755	0.78515	0.7745	0.2532	0.23495	0.43175
other-Bacillus 3	1761099	1766533	5435	57	RS-D-2	0	0	0	0	0	0.0408	0.073	0.1083	0.1132	0.0511	0.1621	0.364
other-Bacillus 3	2827458	2832381	4924	64	RS-D-2	0	0	0	0	0	0.0349	0.0686	0.1014	0.10745	0.03515	0.10915	0.30705
other-Bacillus 3	3081530	3081611	82	8	RO-E-2	0	0	0	0	0	0.02495	0.06455	0.10635	0.11385	0.0344	0.10105	0.2949
other-Bacillus 3	3116204	3119895	3692	85	RS-D-2	0	0	0	0	0	0.0384	0.0689	0.1012	0.1042	0.0369	0.1054	0.2944
other-Bacillus 3	1217137	1219524	2388	39	RS-D-2	0	0	0	0	0	0	0	0	0	0	0.1039	0.07
other-Bacillus 3	1237833	1252435	14603	213	RS-D-2	0	0	0	0	0	0	0	0	0	0	0.1	0.0683
other-Bacillus 3	2946937	2954019	5220	110	RS-D-2	0	0	0	0	0	0	0	0	0	0	0.10575	0.0679
All foreign DNA fragments (HGT fragments) that reached a frequency of 10% or above in at least one time point examined are listed (similar order as in Figure 5). For each of the foreign DNA fragments, the following information is provided: The linage at which it was detected (i.e. other-Bacillus 1 - orange, other-Bacillus 2 -yellow or other-Bacillus 3- green), coordinates on Bacillus subtilis 168…

## Sheet: Mutations
Table S2: List of HGT fragments and mutations identified in each of the three other-Bacillus populations.
lineage	position	ref	alt	CDS	freq gen 42	freq gen 84	freq gen 126	freq gen 168	freq gen 210	freq gen 252	freq gen 294	freq gen 336	freq gen378	freq gen 420	freq gen 462	freq gen 504
other-Bacillus 1	1696583	C	A	fliI	0	0.3714	0.3308	0.1155	0.0701	0.0207	0	0	0	0	0	0.0447
other-Bacillus 1	3638128	AT	A	flgL	0	0.1161	0.1244	0.0635	0.0416	0	0	0.0503	0.0494	0.0646	0.0852	0.0505
other-Bacillus 1	11588	A	C	[]	0	0	0.1429	0	0	0	0	0	0	0	0	0
other-Bacillus 1	1434707	CCAAGCTCAT	C	motA	0	0	0	0	0	0.0906	0.1077	0.0491	0	0.0559	0	0.0996
other-Bacillus 1	1705729	AT	A	fliQ	0	0	0	0	0	0.134	0.236	0.7632	0.8112	0.7634	0.8437	0.6701
other-Bacillus 1	98707	T	G	[]	0	0	0	0	0	0	0	0	0	0.129	0	0
other-Bacillus 1	637210	A	C	[]	0	0	0	0	0	0	0	0	0.1852	0	0	0
other-Bacillus 2	1696583	C	A	fliI	0	0.2863	0.3184	0.2507	0.1791	0.1912	0.2764	0.5742	0.8182	0.9771	0.9906	0.975
other-Bacillus 2	3638128	AT	A	flgL	0	0.0852	0.1682	0.3265	0.3718	0.3717	0.3035	0.1068	0	0	0	0
other-Bacillus 2	171766	T	G	[]	0	0	0	0.1	0	0	0	0	0	0	0	0
other-Bacillus 2	98689	T	G	[]	0	0	0	0	0	0.1667	0	0	0	0	0	0
other-Bacillus 2	52809	T	G	veg	0	0	0	0	0	0	0.0504	0.1213	0.2825	0.8866	0.3578	0.162
other-Bacillus 2	3952742	AAATCCGAAAGGCGT	A	dltA	0	0	0	0	0	0	0.0544	0.1234	0.0897	0	0	0
other-Bacillus 2	2897453	T	C	[]	0	0	0	0	0	0	0.038	0.0696	0.2101	0.0508	0	0.0324
other-Bacillus 2	52887	A	C	veg	0	0	0	0	0	0	0.0367	0.0968	0.2084	0.0429	0	0.0286
other-Bacillus 2	4142337	A	AT	argI	0	0	0	0	0	0	0	0	0.0434	0.7473	0.3046	0.1596
other-Bacillus 2	4146164	T	C	rocR	0	0	0	0	0	0	0	0	0	0.0365	0.5942	0.7026
other-Bacillus 2	163438	A	C	[]	0	0	0	0	0	0	0	0	0	0.1667	0	0
other-Bacillus 2	2592189	GC	G	yqfU	0	0	0	0	0	0	0	0	0	0	0.0444	0.1234
other-Bacillus 3	163712	T	G	[]	0.1333	0	0	0	0	0	0	0	0	0	0	0
other-Bacillus 3	98689	T	G	[]	0.1765	0	0	0	0.1765	0	0.2727	0	0	0	0	0
other-Bacillus 3	1696583	C	A	fliI	0.0249	0.3566	0.32	0.2971	0.096	0	0	0	0	0	0	0
other-Bacillus 3	3638128	AT	A	flgL	0	0.2036	0.3412	0.4009	0.3819	0.3967	0.5602	0.81	0.8076	0.2793	0.2947	0.6372
other-Bacillus 3	410034	A	C	tcyB	0	0	0	0.0214	0.2561	0.5153	0.3039	0.0921	0.1119	0.6915	0.5624	0.2
other-Bacillus 3	1442027	T	C	[]	0	0	0	0	0.2444	0.5075	0.3414	0.1106	0.0966	0.6717	0.5677	0.1804
other-Bacillus 3	1706046	G	A	fliR	0	0	0	0	0.1953	0.4752	0.3125	0.101	0.0876	0.6707	0.5496	0.1618
other-Bacillus 3	3085375	A	C	ytdP	0	0	0	0	0	0.0227	0.0639	0.1112	0.1148	0.0561	0.1339	0.3253
other-Bacillus 3	3085591	A	C	ytdP	0	0	0	0	0	0.0371	0.0627	0.1182	0.1274	0.0339	0.1207	0.3177
other-Bacillus 3	2832721	G	GT	[]	0	0	0	0	0	0.0417	0.0509	0.0973	0.0938	0	0.0986	0.3009
other-Bacillus 3	3080877	A	C	yteS	0	0	0	0	0	0.0487	0.0583	0.1107	0.1126	0.0341	0.1135	0.3006
other-Bacillus 3	951397	C	CA	[]	0	0	0	0	0	0	0.0644	0.0876	0.1104	0	0.0995	0.2816
other-Bacillus 3	3854079	T	C	ywhA	0	0	0	0	0	0	0	0	0	0.0337	0.2047	0.1088
other-Bacillus 3	2373768	T	G	trpF	0	0	0	0	0	0	0	0	0	0	0.1229	0.0512
other-Bacillus 3	4068545	TC	T	[]	0	0	0	0	0	0	0	0	0	0	0.1213	0.0753
other-Bacillus 3	1237467	A	G	yjbM	0	0	0	0	0	0	0	0	0	0	0.119	0.076
other-Bacillus 3	2970882	GGCC	G	[]	0	0	0	0	0	0	0	0	0	0	0.1143	0.0897
other-Bacillus 3	1767151	AT	A	[]	0	0	0	0	0	0	0	0	0	0	0.1089	0.0659
other-Bacillus 3	1767180	A	AT	[]	0	0	0	0	0	0	0	0	0	0	0.1084	0.0679
other-Bacillus 3	3450864	G	A	[]	0	0	0	0	0	0	0	0	0	0	0.1039	0.0754
other-Bacillus 3	2380048	T	G	aroF	0	0	0	0	0	0	0	0	0	0	0.1021	0.0645
other-Bacillus 3	2970912	GTT	G	[]	0	0	0	0	0	0	0	0	0	0	0.1005	0.0813
other-Bacillus 3	456844	C	CT	[]	0	0	0	0	0	0	0	0	0	0	0.1002	0.0696
All mutations that reached a frequency of 10% or above in at least one time point examined are listed (similar order as in Figure 5). For each mismatch or indel not contained within a foreign DNA fragment the following information is provided: The lineage at which it was detected (color-coded as for foreign DNA fragments), position on Bacillus subtilis 168 genome, original nucleotide (ref), alter…
